# Supplementary material
Source: PubMed Central journal article supplement (PMC6842423)
Supplement: NIHMS1536082-supplement-1.pdf [file NIHMS1536082-supplement-1.pdf]

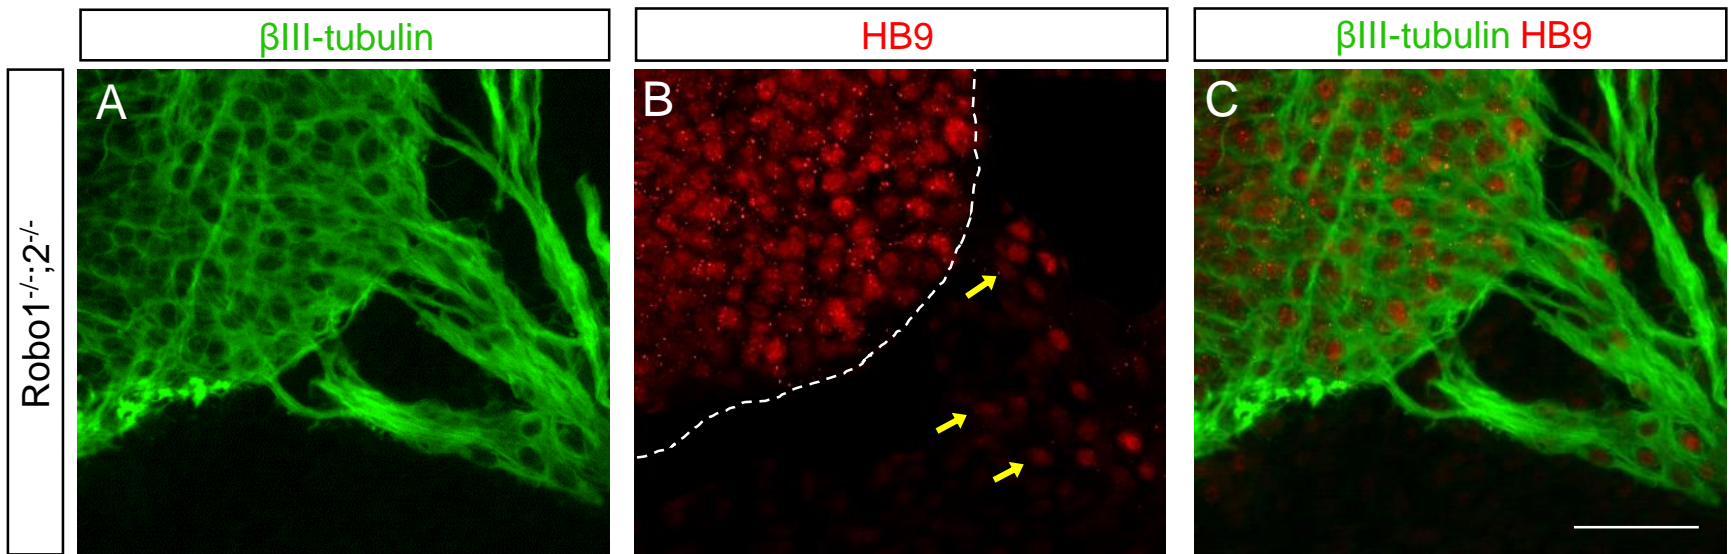

Suppl. Fig. 1. HB9+ motor neurons migrate outside the spinal cord in Robo1/2 mutants.

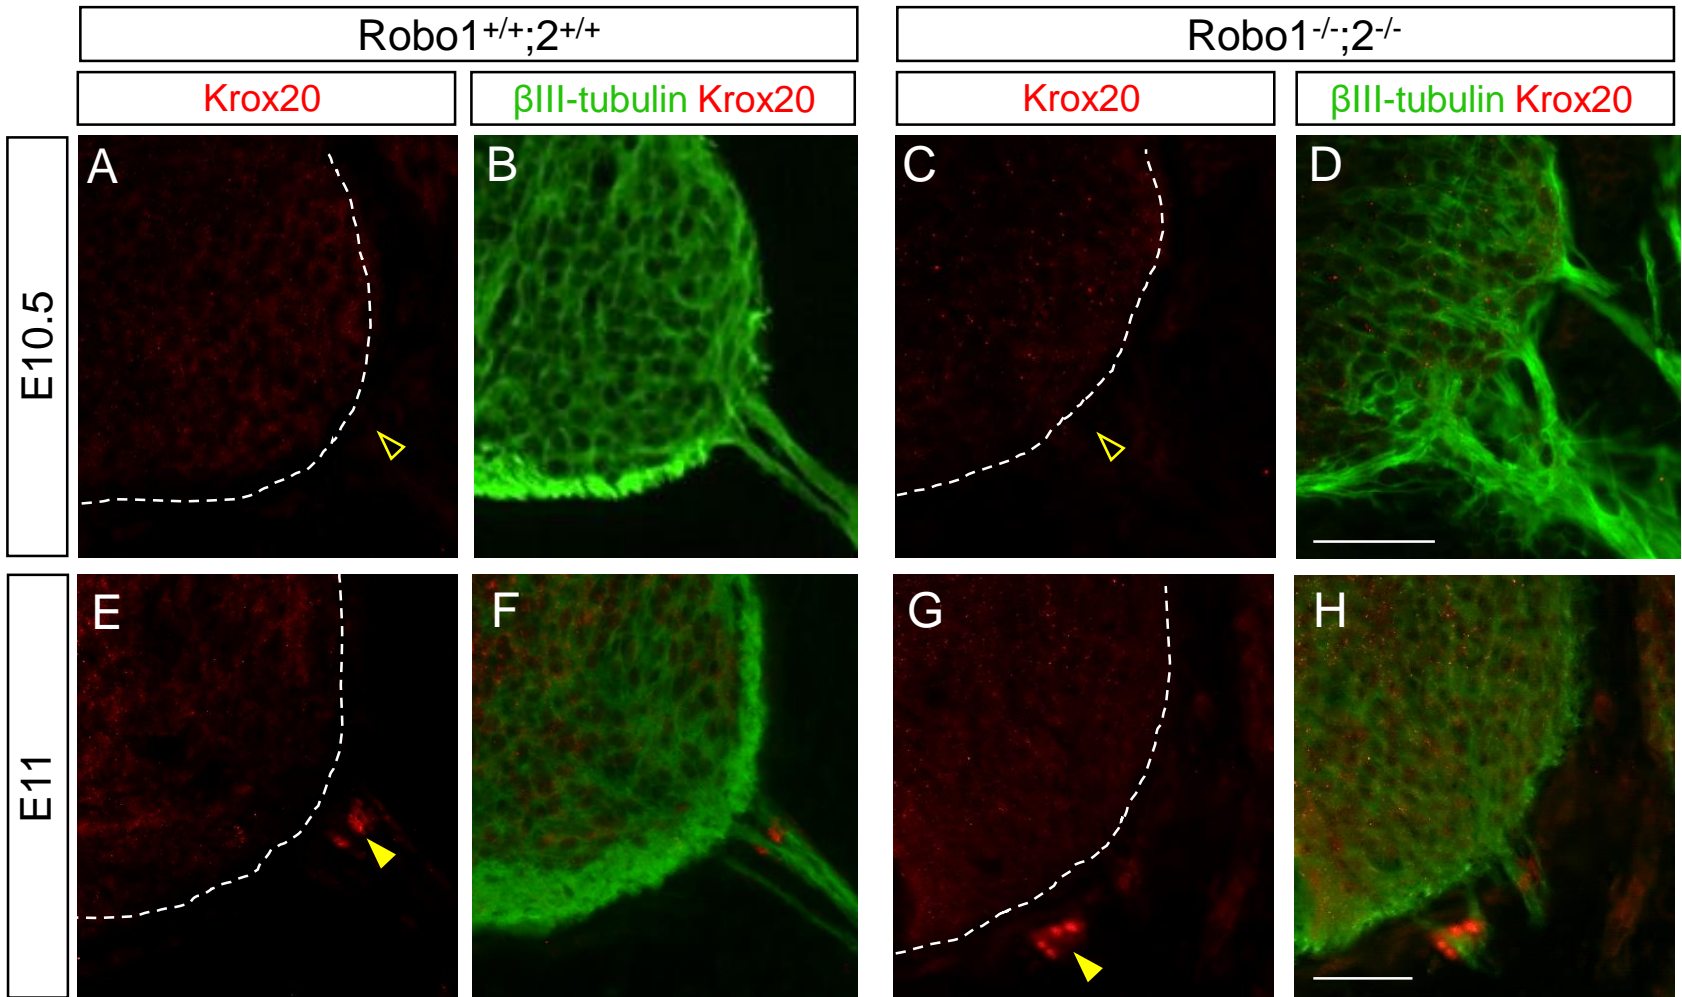

Suppl. Fig. 2. Krox20<sup>+</sup> BC cell clusters are present at motor exit points in E11 wild-type and Robo1/2 double mutant spinal cords.

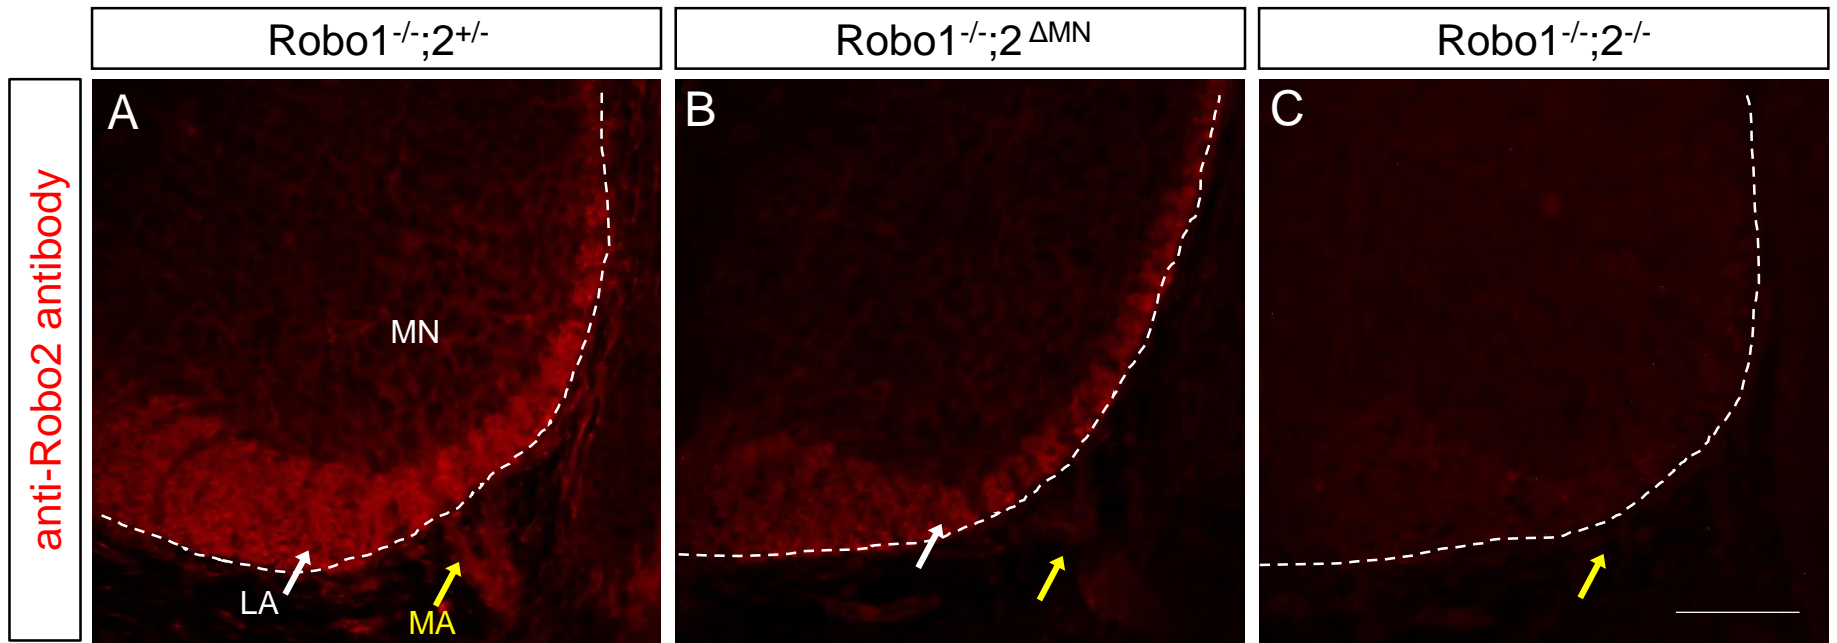

Suppl. Fig. 3. Robo2 antibody labeling is depleted by spinal motor neurons and motor axons in motor neuron-specific Robo2 knockout spinal cords.

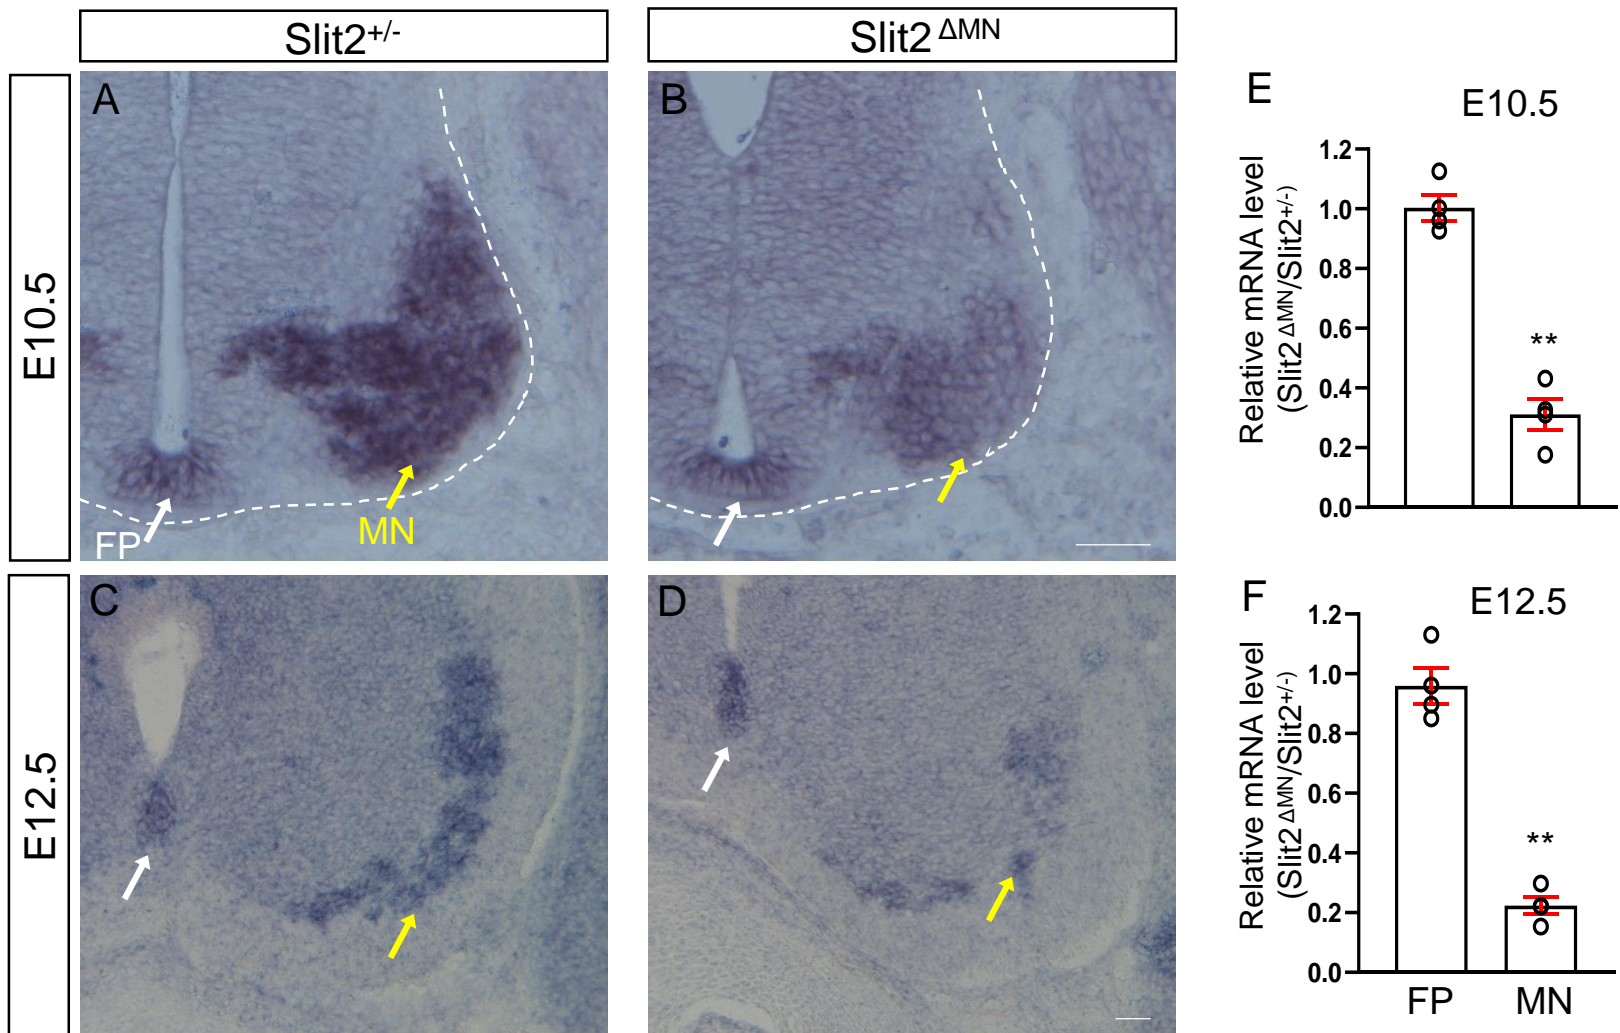

Suppl. Fig. 4. Slit2 exon8 transcript is reduced by spinal motor neurons in motor neuron-specific Slit2 knockout spinal cords.
